# Supplementary material for: Visualizing Borrelia burgdorferi Infection Using a Small-Molecule Imaging Probe
Source: PubMed Central journal article supplement (PMC8218751; doi:10.1128/jcm.02313-20), 2021-06-18
Supplement: jcm.02313-20-s0001.pdf [file jcm.02313-20-s0001.pdf]

Supplemental Figures

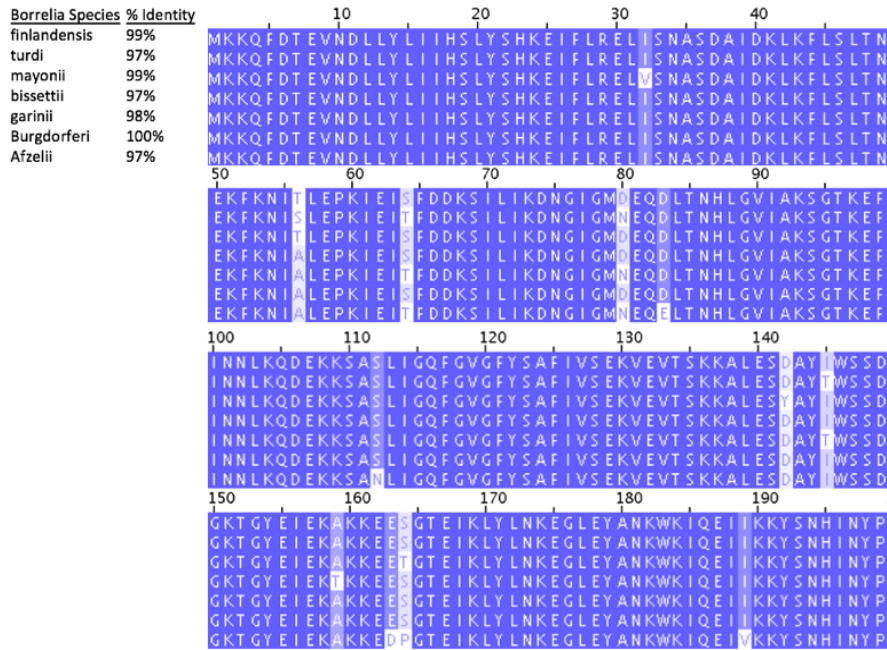

Supplemental Figure 1: Sequence alignment of HtpG from Borrelia spirochete utilizing Clustal Omega Multiple Sequence Alignment Program.

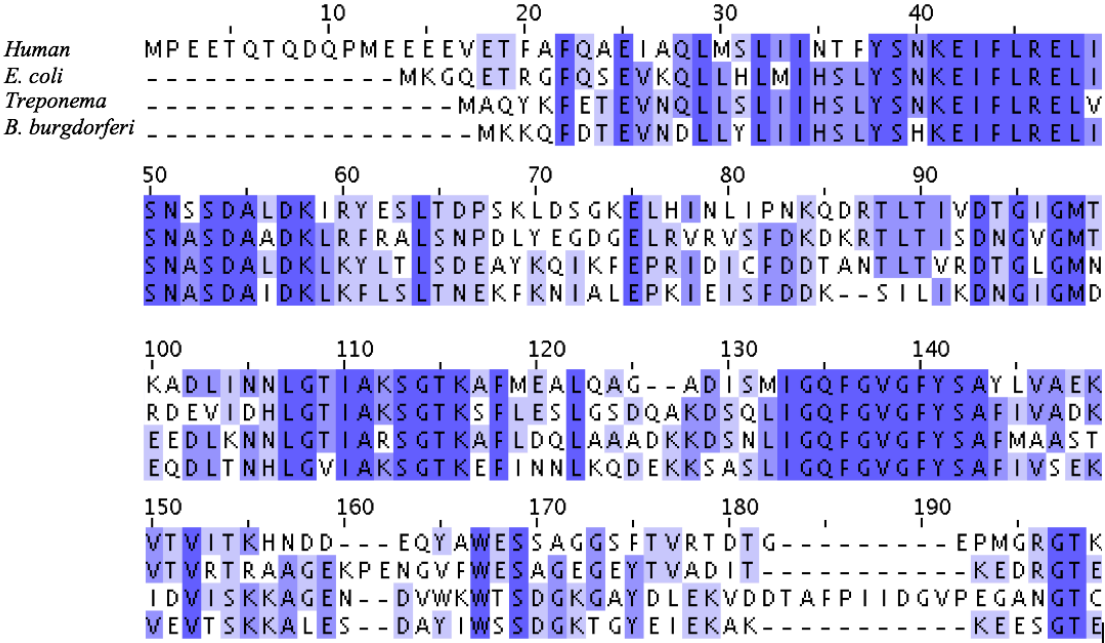

Supplemental Figure 2: Protein sequence alignment of ATPase domains of Human Hsp90, E. coli HtpG, T. denticola HtpG, and B. burgdorferi HtpG. Identical amino acids across all species are highlighted in dark blue and those with decreasing % of identity shown in correspondingly lighter shades.
