# Supplementary material for: Visualizing Borrelia burgdorferi Infection Using a Small-Molecule Imaging Probe
Source: PubMed Central journal article supplement (PMC8218751; doi:10.1128/jcm.02313-20), 2021-06-18
Supplement: jcm.02313-20-s0002.pdf [file jcm.02313-20-s0002.pdf]

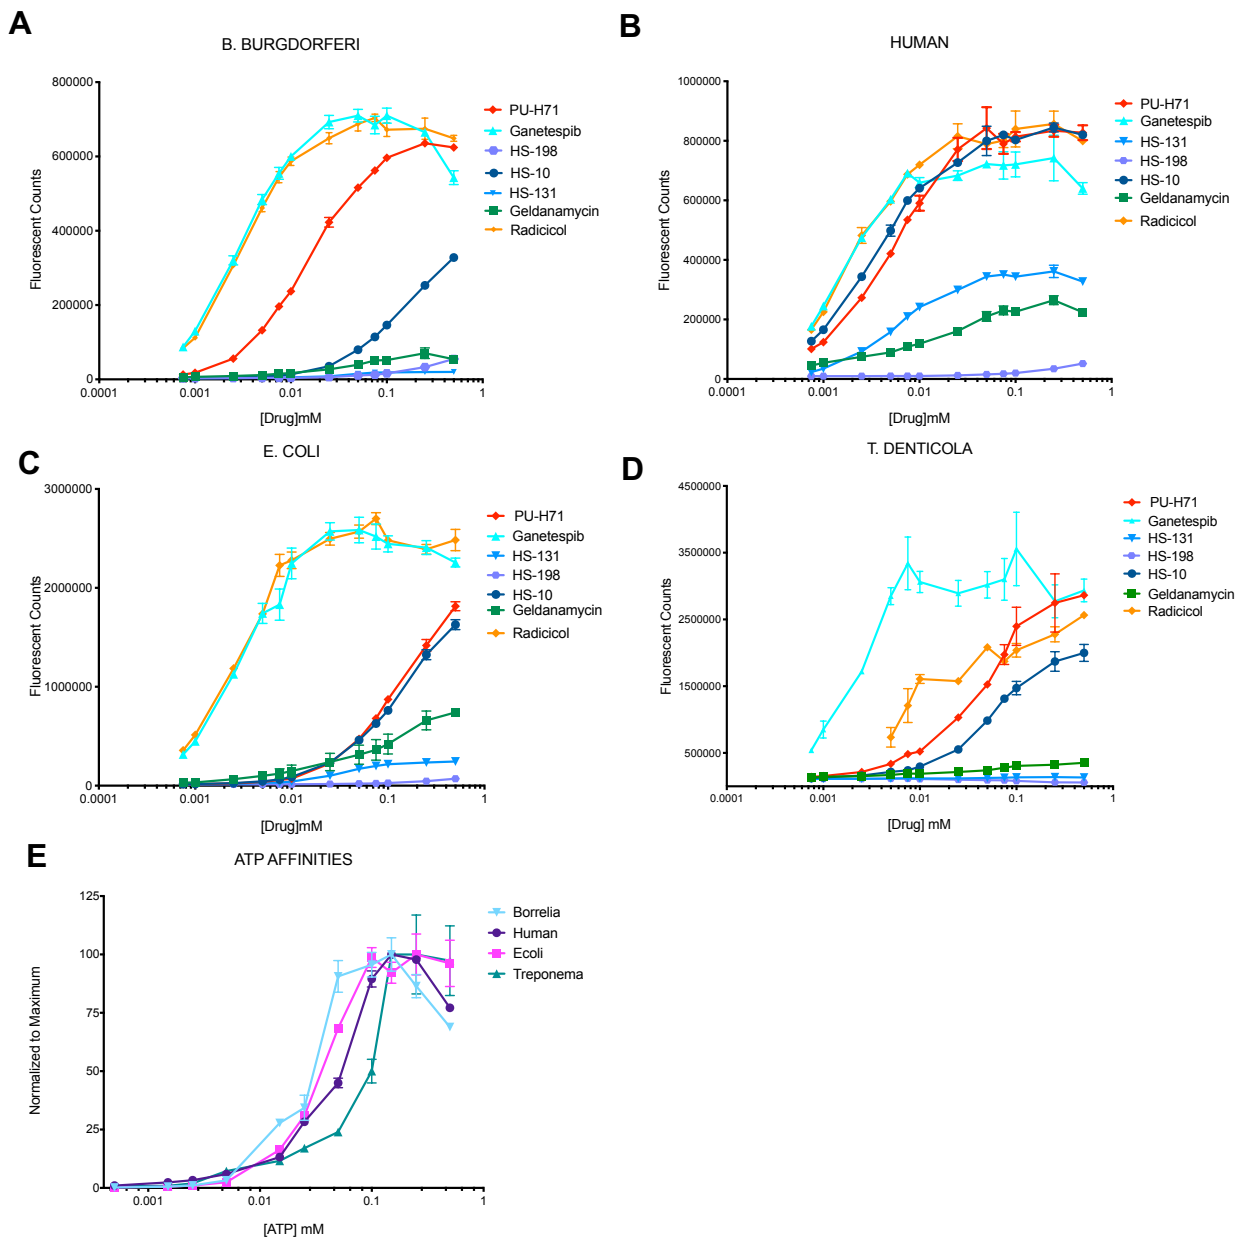

Supplementary Figure 3: **GFP-bound Hsp90 homologues eluted with the Hsp90 inhibitors (n=3)**. PU-H71, Ganetespiib, Geldanamycin, Radicicol, HS-198, HS-131, and their ligand without the fluor, HS-10, eluted Hsp90 homologues from ATP-sepharose beads in the FLECS assay. The ATP affinity curves were utilized to identify the  $IC_{50}$  and then find the relative  $K_m$  of each species as compared to published Human Hsp90 value ( $K_m=300 \mu M$ ) (Supplementary table 1). The  $K_m$  of each species was then used to calculate the  $K_d$ 's as shown in Table 1.
