# Supplementary material for: Visualizing Borrelia burgdorferi Infection Using a Small-Molecule Imaging Probe
Source: PubMed Central journal article supplement (PMC8218751; doi:10.1128/jcm.02313-20), 2021-06-18
Supplement: jcm.02313-20-s0003.pdf [file jcm.02313-20-s0003.pdf]

**Supplementary Table 1- Km of ATP for HtpG and Hsp90**

| <i>E. coli</i> ( $\mu\text{M}$ ) | <i>B. burgdorferi</i> ( $\mu\text{M}$ ) | Human( $\mu\text{M}$ ) | <i>T. denticola</i> ( $\mu\text{M}$ ) |
|----------------------------------|-----------------------------------------|------------------------|---------------------------------------|
| 220                              | 170                                     | 300                    | 510                                   |

Supplementary Table 1:  $K_m$ 's of Hsp90 homologues for ATP of Human and *E.coli* have previously been published while *B. burgdorferi* and *T. denticola* have not. These values are essential for calculating the  $K_i$  of each compound for each species. An indirect method to find these values was to find the proportional  $K_m$  to the known human value ( $K_m=300\mu\text{M}$ ),  $EC_{50}$ 's were calculated from their ATP elution (supplementary Fig 1E),  $\frac{K_m(\text{new species})}{K_m(\text{published human})} = \frac{EC_{50}(\text{new species})}{EC_{50}(\text{human})}$ . This method was confirmed using the known *E. coli* value. ( $K_m= 250\pm 82 \mu\text{M}$ ).

**SUPPLEMENTARY TABLE 2- KD OF KNOWN HSP90 INHIBITORS**

|                     | <i>E. coli</i> ( $\mu\text{M}$ ) | <i>B. burgdorferi</i> ( $\mu\text{M}$ ) | Human( $\mu\text{M}$ ) | <i>T. denticola</i> ( $\mu\text{M}$ ) |
|---------------------|----------------------------------|-----------------------------------------|------------------------|---------------------------------------|
| <b>HS-198</b>       | 5.8 +/- .6                       | 5.6 +/- 3                               | ---                    | ---                                   |
| <b>HS-131</b>       | 1.3                              | 1 +/- .1                                | 0.3                    | ---                                   |
| <b>HS-10</b>        | 4.1 +/-1                         | 3.5+/- .3                               | 0.2                    | 7+/- 4                                |
| <b>RADICICOL</b>    | 0.1                              | 0.1                                     | 0.09                   | 3.0 +/- 2                             |
| <b>PU-H71</b>       | 4.3 +/- 1                        | 0.5                                     | 0.3                    | 5 +/- 3                               |
| <b>GANETESPIB</b>   | 0.1                              | 0.1                                     | 0.1                    | 0.03                                  |
| <b>GELDANAMYCIN</b> | 2.5 +/- .4                       | 1.2 +/- .2                              | .9                     | 5 +/- 3                               |
